# Supplementary material for: Chromosomal Instability Substantiates Poor Prognosis in Patients with Diffuse Large B-cell Lymphoma
Source: Oxford University Press journal article supplement (doi:10.1158/1078-0432.ccr-11-2049), 2011-12-15
Supplement: 10780432ccr112049-sup-t1_xls_72k.xls [file 10780432ccr112049-sup-t1_xls_72k.xls]

## Sheet: Patient cinical characteristics
Supplementary Table 1. Individual clinical characteristics of patients in the study and their treatment plan
Patient number	Sex	Overall survival (yrs)	Last known outcome (Alive/Deceased)	IPI Score	Treatment-free survival (yrs)	Stage at diagnosis	Bone-Marrow involvement	Numer of treatment regimens to date	Tumor site	Subtype (Germinal Center/Non-Germinal Center)	Treatment types (R=rituximab, CHOP=Cyclophosphamide+Hydroxydaunorubicin+Oncovin+Vindesin/vincristine+Prednisone, B=Bleomycin, ICE=Ifosfamide+Carboplatin+EtoPoside, DHAP=Dexamethasone+cytarabine+cisplatin, ESHAP=etoPoside+methylprednisolone+cytarabine+cisplatin, CDP=demcitabine+dexamethasone+cisplatin, CemOX=Gecitabine+Oxaliplatin, CVP=cyclophosphamide+Vindesine+bleomycin, ProMACE-CytaBOM=Cyclopho…	Notes
1	M	2	D	N/A	0.5	2	Pos	4	R Ingu LN	nonGC	RCOPEX6, EPOCH, NED, transplant, C1D1 RICE	Bone marrow involvement of low grade lymphoma
2	M	5	A	0/1	4.5	1	Neg	1	L upper neck LN	GC	CHOP, XRT
3	M	3	N/A	2	2	3	Neg	1	Ant. Medistinal	GC	R-CHOPx6
4	M	7	A	2	6.5	2	Neg	2	R axilla LN	nonGC	HyperCVAD x5 XRT
5	F	3	A	0/1	3	1	Neg	1	Retroperitoneal	GC	RCVP
6	M	6	A	2	5.5	3	Pos	1	Spleen	nonGC	CHOP	Limited involvement of the BM with DLBCL
7	M	7	A	0/1	0.25	1	Neg	3	Small intestine	nonGC	rchopx6, 06 resection, promace cytabom
8	F	1	D	4/5	0	4	Neg	0	L Neck	nonGC	none
9	M	1.5	A	0/1	1	1	Neg	1	Base of tongue	GC	RCHOP, XRT
10	M	5	D	N/A	3	1	Neg	3	R testicle	nonGC	RCHOP, RCHOP (did not complete) +XRT, RCHOP
11	M	9	A	4/5	3	4	Pos	3	L axilla	Unclassified	RCHOPx6 in 2002, relapse 2006 RICE promace,. Rituximab
12	M	12	A	0/1	0.5	2	Neg	3	Spleen	nonGC	CHOP, COPE, PROmACE
13	F	1	D	N/A	0	2	N/A	1	L neck mass	nonGC	CHOP
14	F	8	N/A	0/1	N/A	3	Neg	1	R Parotid	GC	chop, IF XRT
15	F	15.5	A	4/5	4	3	Neg	4	Intraclavicular mass	GC	Ds 9/1995 - surgery RCHOp XRT till 9/1996, 1999 relapse MINE XRT till 5/2000, 6/2004 relapse ESHAP till 9/2004, RICE 2004 auto 11/2004, CR since 2005, maitenance rit till 2006
16	M	1.5	A	0/1	1	3	Pos	1	L inguinal/femoral LN	GC	RCOPE	Bone marrow involvement of low grade lymphoma
17	F	2	D	3	0.2	4	Pos	4	Retroperitoneal	nonGC	1984 CVP+bleom, CHOP in'87, XRT, transformed to DLBCL in 1999 RCHOP, ESHAP, autolo, Rit after relapse deceased 2001
18	F	10.3	A	0/1	10	1	Neg	1	L neck	nonGC	CHOP, IF XRT
19	F	1.5	D	4/5	0.5	4	Neg	2	R ovary+tube	Unclassified	MHOPB, XRT, Adriamycin +cytoxan, ESHEP
20	F	1	D	4/5	0	3	N/A	1	R groin LN	nonGC	Promace Cytobam
21	F	5	A	0/1	5	3	Neg	1	Subcarinal LN	GC	CHOP
22	M	3	D	2	0	4	Neg	6	L supraclavicular	nonGC	CHOp, ESHAPx2, BVAC, autotranspl, Rit, promace cytabom
23	F	10	A	0/1	3	2	Neg	2	Mediastinal	GC	CHOP, XRT, ESHOP, AutoTransplant
24	F	1.5	D	4/5	0.25	2	N/A	1	Thyroid	nonGC	RCOPE
25	M	6	D	2	5	2	Neg	3	L inguinal LN	nonGC	CVPx4 +XRT, 2000 PRoMACE CytaBOMx1, ESHA
26	F	0.5	D	4/5	0	3	Pos	1	Spleen	nonGC	surgery and ?chop	Limited involvement of the BM with DLBCL
27	F	13	D	4/5	2	4	Pos	4	Bladder	GC	chop, multipe radiation
28	F	2	D	3	0.3	4	Pos	3	R femoral LN	GC	R-chop X 6, AutoSCT, CVP, promace CytaBom +Rit, ESHAP, XRT
29	M	6	A	0/1	5	2	Pos	1	L submandibular	GC	RCHOP XRT	Bone marrow involvement of low grade lymphoma
30	F	5	A	2	4.5	3	Neg	1	Pancreas	GC	RCHOP
31	F	7.5	A	4/5	7	3	Neg	1	Spleen+LN	GC	RCHOP
32	M	2	D	4/5	0	4	Neg	4	Retroperitoneal	GC	CHOP, CVP, Promace cytabom rit, eshap, XRT
33	F	0.1	D	4/5	0	4	Pos	1	R tonsil	nonGC	RCOPE
34	M	3	D	4/5	N/A	3	Pos	1	R axilla LN	GC	rchop	Bone marrow involvement of low grade lymphoma
35	F	6	A	2	0.1	2	Neg	4	Pelvic mass	nonGC	ice, dhap, radiation, stem cell rescue
36	M	3	A	2	0.3	2	Neg	3	Retroperitoneal	GC	rchopx6, ricex2, autosct
37	M	1	D	4/5	0.2	4	Neg	2	R thyroid	GC	CHOP and ?
38	M	0.75	D	4/5	0.1	4	Neg	2	R testicle	Unclassified	rchopx3, promacecytabom
39	F	2	D	2	0	1	Neg	1	Abd mass	GC	RCHOP
40	F	5.6	A	4/5	5.3	4	Pos	6	Parotid	nonGC	RCOpex5 XRT
41	F	5	A	2	4.5	2	Neg	1	R tonsil	nonGC	RCHOP
42	M	4	A	N/A	N/A	N/A	Neg	1	L testicle	Unclassified	N/A
43	M	2	D	4/5	0	4	Neg	1	R parietal lesion additional	GC	R-CHOP/COPE
44	F	4	D	N/A	N/A	N/A	Neg	6	L axilla LN	Unclassified	r-chop x6 2003
45	F	3	A	2	3	2	Neg	1	Ant mediastinal	Unclassified	RCHOP
46	F	3.5	A	0/1	3	2	Neg	2	Mediastinal	nonGC	RCHOP x 5, IF XRT 2006
47	M	4.5	A	0/1	4	1	Neg	1	R nasal mass	nonGC	RCHOPx3, IF XRT
48	F	14	A	N/A	N/A	N/A	N/A	N/A			N/A
49	F	5.5	A	0/1	5	1	Neg	1	Supraclavicular LN	nonGC	RCHOP
50	M	1	D	0/1	0.25	2	Neg	4	LN	nonGC	CHOPx4, IF XRT + Rit, rchop, cope
51	F	9	A	2	4	2	Neg	2	Celial LN	nonGC	CHOPx6, ProMACE CytaBOM
52	M	11	A	0/1	10	2	Neg	1	Mediastinal	nonGC	CHOPx6, IF XRT
53	M	6	D	3	N/A	2	Neg	3	Stomach	Unclassified	CHOPx3?
54	M	1	N/A	N/A	N/A	N/A	Neg	1	Buccal gingiva	Unclassified	N/A
